# Supplementary material for: Prevalence of Alcohol Misuse and Follow-Up Care in a National Sample of OEF/OIF VA Patients With and Without TBI
Source: Atypon-hosted journal article supplement (doi:10.1176/appi.ps.201500290), 2016-08-01
Supplement: appi.ps.201500290.ds001.pdf [file appi.ps.201500290.ds001.pdf]

Appendix A.

*The Alcohol Use Disorders Identification Test – Consumption (AUDIT-C) Questionnaire*

Q#1. How often have you had a drink containing alcohol in the last year?

*Never (0 points); monthly or less (1); 2 to 4 times per month (2); 2 to 3 times per week (3); 4 or more times a week (4)*

Q#2. How many drinks containing alcohol did you have on a typical day when you were drinking in the past year?

*0 drinks (0 points); 1-2 drinks (0); 3-4 drinks (1); 5-6 drinks (2); 7-9 drinks (3); 10 or more drinks (4)*

Q#3. How often did you have six or more drinks on one occasion in the past year?

*Never (0 points); less than monthly (1); monthly (2); weekly (3); daily or almost (4)*
